# Supplementary material
Source: PubMed Central journal article supplement (PMC5527196)
Supplement: etj-0006-0152-s01.pdf [file etj-0006-0152-s01.pdf]

**THYRDEL****Observational study on the management of hyperthyroidism  
in France****Initial Questionnaire****Verification of the Patient Eligibility Criteria**

| <b>Inclusion criteria</b>                                                                                                               | <b>Yes</b>                 | <b>No</b>                  |
|-----------------------------------------------------------------------------------------------------------------------------------------|----------------------------|----------------------------|
| Adult patients (age ≥18 years) seen in consultation, diagnosed with hyperthyroidism, whether a first episode or relapse after treatment | 1 <input type="checkbox"/> | 2 <input type="checkbox"/> |
| Patient in whom treatment (medication, surgery, Iodine-131 ...) for hyperthyroidism was initiated within 4 months prior to inclusion    | 1 <input type="checkbox"/> | 2 <input type="checkbox"/> |
| Patient having given his/her verbal agreement                                                                                           | 1 <input type="checkbox"/> | 2 <input type="checkbox"/> |

*If one of the answers is negative, the patient cannot be included in the study*

| <b>Exclusion criteria</b>                                                                                                                                                | <b>Yes</b>                 | <b>No</b>                  |
|--------------------------------------------------------------------------------------------------------------------------------------------------------------------------|----------------------------|----------------------------|
| Patient enrolled in a clinical trial or having participated in a clinical trial during the last 4 months                                                                 | 1 <input type="checkbox"/> | 2 <input type="checkbox"/> |
| Patient at significant risk of not being able to be followed up to the next thyroid hormone assay (FT3, FT4 and TSH) (move, disease affecting short-term prognosis ...). | 1 <input type="checkbox"/> | 2 <input type="checkbox"/> |

*If one of the answers is positive, the patient cannot be included in the study*

1. **Date of the appointment (dd/mm/yyyy):**

2. **Date of diagnosis of hyperthyroidism or relapse (dd/mm/yyyy):**

**General Patient Characteristics**

3. **Gender of the patient:** 1  Female 2  Male

**If female, current pregnancy?:** 1  Yes 2  No

4. **Age of the patient:**  years

5. **Weight:**  kg

6. **Height:**  cm

7. **Is the patient being treated jointly by another doctor for his/her hyperthyroidism or is joint treatment with another doctor planned?** 1  Yes 2  No

**If yes, specify by whom:** 1  General Practitioner 2  Specialist, specify: \_\_\_\_\_

8. **Smoking:** 1  Current smoker 2  Ex-smoker 3  Has never smoked

**If the patient is a "current smoker" please specify the following:**

Number of cigarettes per day:

Length of smoking (*in months OR years*):  months OR  years

**Clinical Data****9. Circumstances of the diagnosis of hyperthyroidism:**

Presence of clinical signs

Systematic check-up or screening

Doctor having asked for the check-up:

The study doctor

A General Practitioner

Another specialist, **specify:** \_\_\_\_\_

Other, specify: \_\_\_\_\_

**10. Etiology of the hyperthyroidism:**

Grave's disease

Toxic adenoma

Multinodular goiter

Thyroiditis, **specify:** \_\_\_\_\_

Iatrogenic origin

amiodarone

contrast medium

interferon

Other, **specify:** \_\_\_\_\_

Other, specify \_\_\_\_\_

**11. Functional signs of hyperthyroidism at diagnosis:**

Palpitations

Thermophobia, polydipsia, excessive sweating

Asthenia

Sleep disorders

Digestive symptoms (rapid transit)

Other, **specify:** \_\_\_\_\_

**12. Physical signs of hyperthyroidism at diagnosis:**

Heart rhythm disorders, atrial fibrillation or other

Weight loss |\_|\_| kg

Tachycardia: |\_|\_|\_| beats/minute

Visible goiter

Other, specify: \_\_\_\_\_

13. Is the patient currently experiencing a relapse?  Yes  No

If Yes,

Date of diagnosis of first episode |\_|\_|/|\_|\_|\_|\_|

Number of relapses since the first episode (including the current episode): |\_| relapses

Treatment of the last episode (several answers possible)

• Synthetic antithyroid medication  Yes  No

• If yes: Name of the antithyroid drug: \_\_\_\_\_

Dosage: |\_|\_| mg/day      |\_| doses/day

Length of treatment:      |\_|\_| months

• Radioactive iodine  Yes  No

• Surgery  Yes  No

### Complications of hyperthyroidism

14. Presence of ophthalmopathy:  Yes  No

• If yes, does it require management by an ophthalmologist  Yes  No

15. Presence of a heart condition requiring special management due to hyperthyroidism:  Yes  No

If yes, specify:  Decompensation of pre-existing heart disease

Atrial fibrillation

Other: Specify \_\_\_\_\_

**Additional thyroid tests****16. Thyroid hormone assays having led to the diagnosis of hyperthyroidism**

| Assay   | Assay carried out                                        | Date of the assay (dd/mm/yyyy) | Assay results                                                                                                                                                                          | Maximum normal value                                                                                                                                                                   |
|---------|----------------------------------------------------------|--------------------------------|----------------------------------------------------------------------------------------------------------------------------------------------------------------------------------------|----------------------------------------------------------------------------------------------------------------------------------------------------------------------------------------|
| TSH     | <input type="checkbox"/> Yes <input type="checkbox"/> No | <input type="text"/>           | <input type="text"/> <input type="text"/> <input type="text"/> <input type="text"/> mu/l                                                                                               |                                                                                                                                                                                        |
| Free T4 | <input type="checkbox"/> Yes <input type="checkbox"/> No | <input type="text"/>           | <input type="text"/> <input type="text"/> <input type="text"/> <input type="text"/> ng/l<br><input type="text"/> <input type="text"/> <input type="text"/> <input type="text"/> pmol/l | <input type="text"/> <input type="text"/> <input type="text"/> <input type="text"/> ng/l<br><input type="text"/> <input type="text"/> <input type="text"/> <input type="text"/> pmol/l |
| Free T3 | <input type="checkbox"/> Yes <input type="checkbox"/> No | <input type="text"/>           | <input type="text"/> <input type="text"/> <input type="text"/> <input type="text"/> ng/l<br><input type="text"/> <input type="text"/> <input type="text"/> <input type="text"/> pmol/l | <input type="text"/> <input type="text"/> <input type="text"/> <input type="text"/> ng/l<br><input type="text"/> <input type="text"/> <input type="text"/> <input type="text"/> pmol/l |

**17. Does the patient have or will he/she be given a prescription to carry out laboratory and/or radiological tests during the initial management of his/her hyperthyroidism or relapse?** Yes  No

If yes, specify which:

- Assay of anti-TSH receptor antibodies  Yes  No

| Date of the assay (dd/mm/yyyy) | Assay results                                                | Interpretation of the assay                                            |
|--------------------------------|--------------------------------------------------------------|------------------------------------------------------------------------|
| <input type="text"/>           | <input type="text"/> mU/l<br><input type="text"/> $\mu$ U/ml | <input type="checkbox"/> positive<br><input type="checkbox"/> negative |

- Assay of anti-TPO antibodies  Yes  No

| Date of the assay (dd/mm/yyyy) | Assay results              | Interpretation of the assay                                            |
|--------------------------------|----------------------------|------------------------------------------------------------------------|
| <input type="text"/>           | <input type="text"/> UI/ml | <input type="checkbox"/> positive<br><input type="checkbox"/> negative |

- Blood count  Yes  No
- Scintigraphy of thyroid  Yes  No
- Thyroid ultrasound  Yes  No
- Other(s), specify: \_\_\_\_\_

**Treatments****18. Treatment of hyperthyroidism**

Please tick all treatments (there may be several answers):

 **Synthetic antithyroid medication**

Please fill in the following table

| Name of treatment | Dosage<br>(tabs/day) or (mg/day)                              | Date treatment started<br>(dd/mm/yyyy)                             | Scheduled length of<br>treatment (months) |
|-------------------|---------------------------------------------------------------|--------------------------------------------------------------------|-------------------------------------------|
|                   | <input type="text"/> doses/day<br><input type="text"/> mg/day | <input type="text"/> / <input type="text"/> / <input type="text"/> | <input type="text"/>                      |

- What was the treatment prescribed for?

- Conservative treatment  
 Preparation for surgery  
 Preparation for treatment by radioactive iodine  
 Intermediate treatment after treatment with radioactive iodine  
 Other: **specify** \_\_\_\_\_

 **Radioactive iodine?**
 Scheduled     Already performed    Date performed: / / 
 **Surgery?**
 Scheduled     Already performed    Date performed: / / 
**19. Other treatments**

- Beta-blockers  
 Anxiolytics  
 Corticosteroids  
 Potassium perchlorate  
 Lugol  
 Other(s), **specify**: -----

**20. What were the deciding factors for the choice of treatment at diagnosis or relapse? (there may be several answers)**

- Etiology of hyperthyroidism  
 Age of the patient  
 Patient who finds it difficult to take long-term treatments  
 Presence of complications  
 Surgery refused  
 Size of goiter  
 Other(s), **specify**: -----
