# Supplementary material
Source: PubMed Central journal article supplement (PMC5527196)
Supplement: etj-0006-0152-s02.pdf [file etj-0006-0152-s02.pdf]

## 3-month Follow-up Questionnaire

Date of the visit or phone call (dd/mm/yyyy)

/ / 20

### Patient treatments

**Please tick all treatments (there may be several answers):**

**Synthetic antithyroid medication**

Was the treatment prescribed while waiting for radical treatment (surgery or radiotherapy)?

Yes  No

**Please complete the table below. Each line corresponds to a change in dosage or synthetic antithyroid medication since the start of treatment.**

| Name of treatment | Dosage<br>(mg/day) and number of<br>doses/day           | Date started                                                       | Date stopped                                                                                                 |
|-------------------|---------------------------------------------------------|--------------------------------------------------------------------|--------------------------------------------------------------------------------------------------------------|
|                   | <input type="text"/> mg<br><input type="text"/> doses/d | <input type="text"/> / <input type="text"/> / <input type="text"/> | <input type="text"/> / <input type="text"/> / <input type="text"/><br>OR<br><input type="checkbox"/> Ongoing |
|                   | <input type="text"/> mg<br><input type="text"/> doses/d | <input type="text"/> / <input type="text"/> / <input type="text"/> | <input type="text"/> / <input type="text"/> / <input type="text"/><br>OR<br><input type="checkbox"/> Ongoing |
|                   | <input type="text"/> mg<br><input type="text"/> doses/d | <input type="text"/> / <input type="text"/> / <input type="text"/> | <input type="text"/> / <input type="text"/> / <input type="text"/><br>OR<br><input type="checkbox"/> Ongoing |
|                   | <input type="text"/> mg<br><input type="text"/> doses/d | <input type="text"/> / <input type="text"/> / <input type="text"/> | <input type="text"/> / <input type="text"/> / <input type="text"/><br>OR<br><input type="checkbox"/> Ongoing |
|                   | <input type="text"/> mg<br><input type="text"/> doses/d | <input type="text"/> / <input type="text"/> / <input type="text"/> | <input type="text"/> / <input type="text"/> / <input type="text"/><br>OR<br><input type="checkbox"/> Ongoing |

If the treatment was stopped prematurely since the last visit, please indicate the stop date:

| | | / | | | / | | | | | |

And the reason for stopping:

- Inefficacy
- Safety problem, specify \_\_\_\_\_
- Non-compliance
- Other, specify \_\_\_\_\_

**Thyroid hormones**

- Name of treatment / \_\_\_\_\_ /
- Current dosage                    | | | | μg/day

**Surgery**

Scheduled                    Date: | | | / | | | / | | | | | |

Already performed        Date: | | | / | | | / | | | | | |

**Specify the type of surgery:**

- Thyroidectomy
- Total
- Partial

**Radioactive iodine**

Scheduled                    Date: | | | / | | | / | | | | | |

Already performed        Date: | | | / | | | / | | | | | |

**Other treatments for the patient's hyperthyroidism, Specify:**

- Beta-blockers
- Anxiolytics
- Corticosteroids
- Potassium perchlorate
- Lugol
- Other(s), specify: -----

**Biological assays performed since the start of treatment**

Please indicate in the table below all the assays performed in the framework of the patient's hyperthyroidism if the results are available.

| Assay   | Date of the assays (dd/mm/yyyy) | Assay results               | Maximum normal value        |
|---------|---------------------------------|-----------------------------|-----------------------------|
| TSH     | <input type="text"/>            | <input type="text"/> mU/l   |                             |
|         | <input type="text"/>            | <input type="text"/> mU/l   |                             |
|         | <input type="text"/>            | <input type="text"/> mU/l   |                             |
|         | <input type="text"/>            | <input type="text"/> mU/l   |                             |
|         | <input type="text"/>            | <input type="text"/> mU/l   |                             |
|         | <input type="text"/>            | <input type="text"/> mU/l   |                             |
| Free T4 | <input type="text"/>            | <input type="text"/> ng/l   | <input type="text"/> ng/l   |
|         | <input type="text"/>            | <input type="text"/> pmol/l | <input type="text"/> pmol/l |
|         | <input type="text"/>            | <input type="text"/> ng/l   | <input type="text"/> ng/l   |
|         | <input type="text"/>            | <input type="text"/> pmol/l | <input type="text"/> pmol/l |
|         | <input type="text"/>            | <input type="text"/> ng/l   | <input type="text"/> ng/l   |
|         | <input type="text"/>            | <input type="text"/> pmol/l | <input type="text"/> pmol/l |
|         | <input type="text"/>            | <input type="text"/> ng/l   | <input type="text"/> ng/l   |
| Free T3 | <input type="text"/>            | <input type="text"/> ng/l   | <input type="text"/> ng/l   |
|         | <input type="text"/>            | <input type="text"/> pmol/l | <input type="text"/> pmol/l |
|         | <input type="text"/>            | <input type="text"/> ng/l   | <input type="text"/> ng/l   |
|         | <input type="text"/>            | <input type="text"/> pmol/l | <input type="text"/> pmol/l |
|         | <input type="text"/>            | <input type="text"/> ng/l   | <input type="text"/> ng/l   |
|         | <input type="text"/>            | <input type="text"/> pmol/l | <input type="text"/> pmol/l |
|         | <input type="text"/>            | <input type="text"/> ng/l   | <input type="text"/> ng/l   |

Center No. Patient No. 

| Assay      | Date of the assays<br>(dd/mm/yyyy)                                                                                                                                                               | Assay results                                                                                                                        | Maximum normal value                                                                       |
|------------|--------------------------------------------------------------------------------------------------------------------------------------------------------------------------------------------------|--------------------------------------------------------------------------------------------------------------------------------------|--------------------------------------------------------------------------------------------|
|            |                                                                                                                                                                                                  | <input type="text"/> <input type="text"/> <input type="text"/> <input type="text"/> <input type="text"/> <input type="text"/> pmol/l | <input type="text"/> <input type="text"/> <input type="text"/> <input type="text"/> pmol/l |
| Leukocytes | <input type="text"/> <input type="text"/> / <input type="text"/> <input type="text"/> / <input type="text"/> <input type="text"/> <input type="text"/> <input type="text"/> <input type="text"/> | <input type="text"/> <input type="text"/> <input type="text"/> <input type="text"/> /mm <sup>3</sup>                                 |                                                                                            |
|            | <input type="text"/> <input type="text"/> / <input type="text"/> <input type="text"/> / <input type="text"/> <input type="text"/> <input type="text"/> <input type="text"/>                      | <input type="text"/> <input type="text"/> <input type="text"/> <input type="text"/> /mm <sup>3</sup>                                 |                                                                                            |
|            | <input type="text"/> <input type="text"/> / <input type="text"/> <input type="text"/> / <input type="text"/> <input type="text"/> <input type="text"/> <input type="text"/>                      | <input type="text"/> <input type="text"/> <input type="text"/> <input type="text"/> /mm <sup>3</sup>                                 |                                                                                            |
|            | <input type="text"/> <input type="text"/> / <input type="text"/> <input type="text"/> / <input type="text"/> <input type="text"/> <input type="text"/> <input type="text"/>                      | <input type="text"/> <input type="text"/> <input type="text"/> <input type="text"/> /mm <sup>3</sup>                                 |                                                                                            |
|            | <input type="text"/> <input type="text"/> / <input type="text"/> <input type="text"/> / <input type="text"/> <input type="text"/> <input type="text"/> <input type="text"/>                      | <input type="text"/> <input type="text"/> <input type="text"/> <input type="text"/> /mm <sup>3</sup>                                 |                                                                                            |
|            | <input type="text"/> <input type="text"/> / <input type="text"/> <input type="text"/> / <input type="text"/> <input type="text"/> <input type="text"/> <input type="text"/>                      | <input type="text"/> <input type="text"/> <input type="text"/> <input type="text"/> /mm <sup>3</sup>                                 |                                                                                            |

After these treatments, do you consider your patient as euthyroid?

 Yes  No

If No, why?

-  Persistence of clinical signs-  Abnormal laboratory results-  Other, specify \_\_\_\_\_
